# Supplementary material
Source: Springer Nature journal article supplement (https://www.springermedizin.de/resource/supplementary/12967_2014_1861_MOESM12_ESM.pdf/9574974)

A

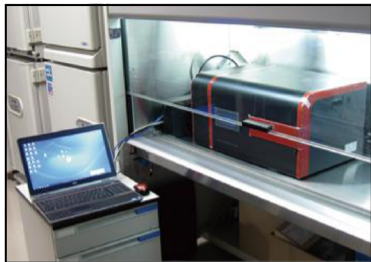

B

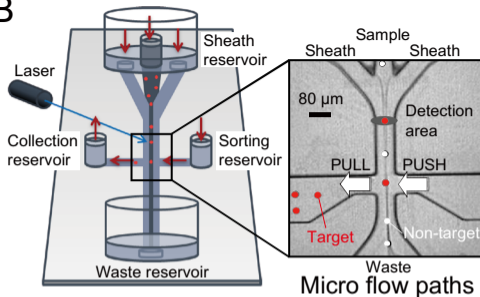

C

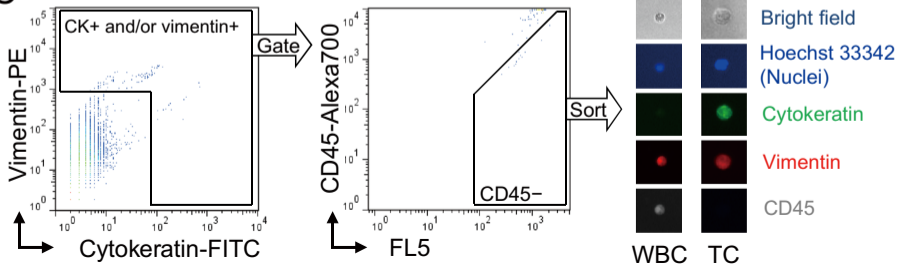

Supplement: MOESM12 [file 9574974]
